# Supplementary material for: ADAM33 Gene Polymorphisms and Mortality. A Prospective Cohort Study
Source: PLoS One. 2013 Jul 4;8(7):e67768. doi: 10.1371/journal.pone.0067768 (PMC3701578; doi:10.1371/journal.pone.0067768)
Supplement: Table S4 — Distribution of genotypes according to being alive or dead at the age of 85, and chance of survival to this age. (DOC) [file pone.0067768.s004.doc]

| SNP | Genotype | Dead at the age of 85 | Alive at the age of 85 | P value* | Chance of survival to  age of 85  OR (95% CI) |
| --- | --- | --- | --- | --- | --- |
| **Q_1** | CC | 197 (77.9) | 44 (75.9) |  | 1 |
|  | CT | 52 (20.6) | 13 (22.4) | 0.947 | 1.2 (0.4-3.1) |
|  | TT | 4 (1.6) | 1 (1.7) |  | 1.0 (0.1-15.3) |
| **S_1** | GG | 222 (86.0) | 49 (81.7) |  | 1 |
|  | GA | 34 (13.2) | 11 (18.3) | 0.475 | 2.2 (0.8-6.5) |
|  | AA | 2 (0.8) | 0 (0.0) |  | - |
| **S_2** | GG | 138 (54.1) | 36 (61.0) |  | 1 |
|  | GC | 96 (37.6) | 19 (32.2) | 0.629 | 0.9 (0.4-2.2) |
|  | CC | 21 (8.2) | 4 (6.8) |  | 1.1 (0.2-6.2) |
| **T_2** | GG | 174 (68.2) | 44 (78.6) |  | 1 |
|  | GA | 70 (27.5) | 12 (21.4) | 0.154 | 1.1 (0.4-2.8) |
|  | AA | 11 (4.3) | 0 (0.0) |  | - |

**Table S4** Distribution of genotypes according to being alive or dead at the age of 85, and chance of survival to this age

Logistic regression adjusted for gender, age, FEV1, height, place of residence and packyears of smoking at survey in 1989/90

* Differences between subjects alive at the age of 85 and those who died before this age tested with χ2 test
